# Supplementary material for: A Novel Role of BIRC3 in Stemness Reprogramming of Glioblastoma
Source: MDPI journal article supplement (doi:10.3390/ijms23010297), 2021-12-28

Figure S1

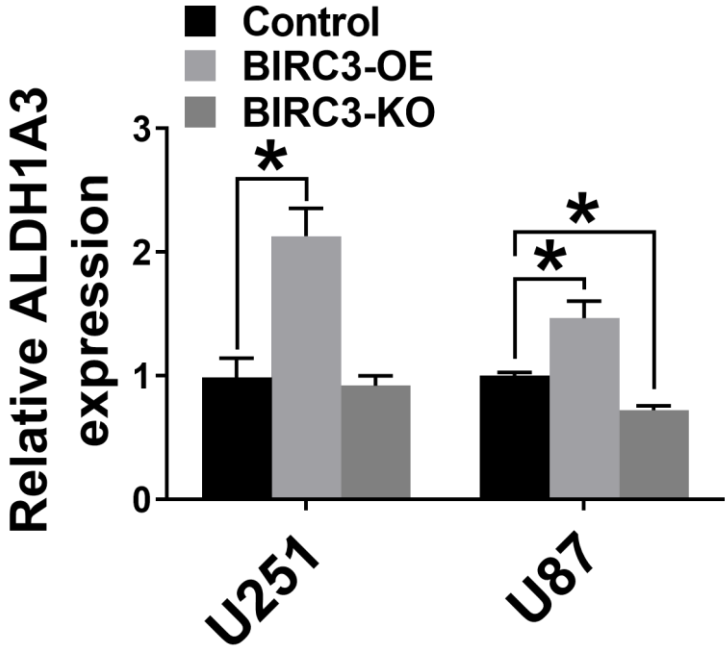

Fig S1. ALDH1A3 mRNA expression analyzed by real-time PCR in U251/U87 control, BIRC3-OE and BIRC3-KO cells. n=3, \* p<0.05.

Figure S2

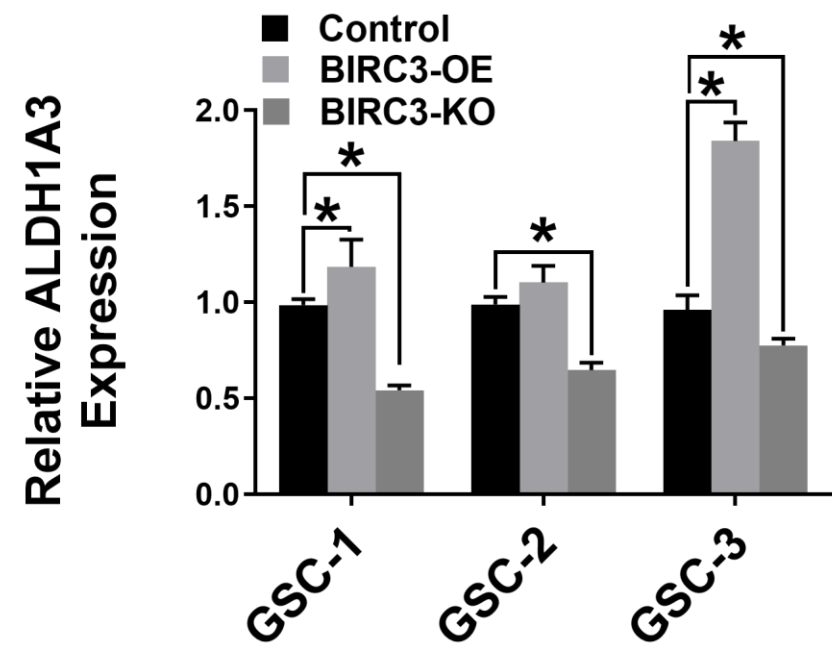

Fig S2. ALDH1A3 mRNA expression analyzed by real-time PCR in control, BIRC3-OE and BIRC3-KO GSCs. n=3, \* p<0.05.

Figure S3

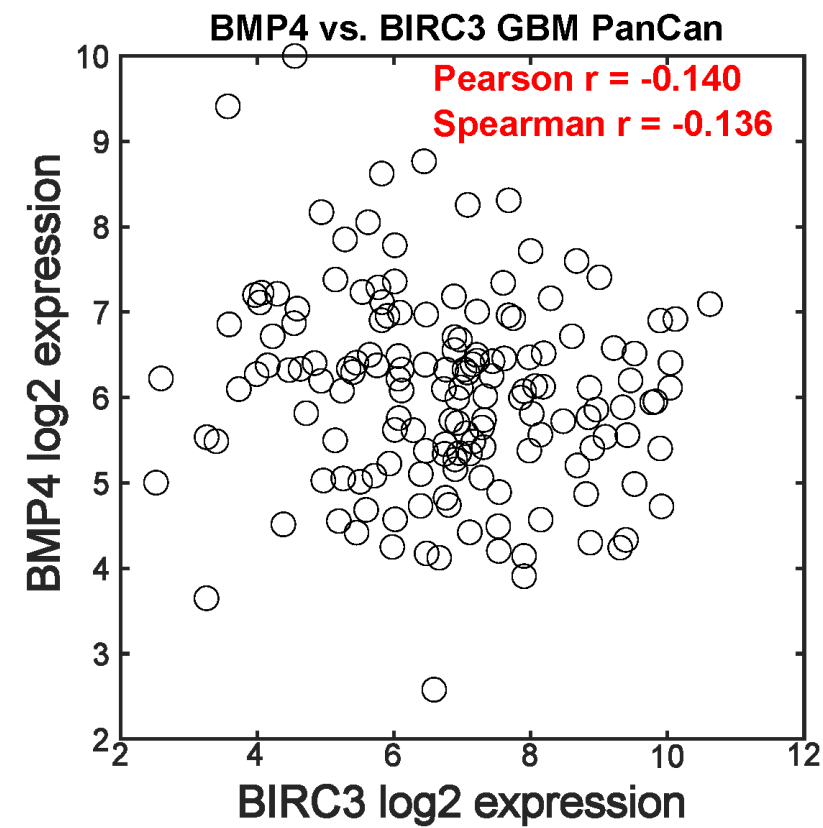

Fig S3. Scatterplots of correlation between BIRC3 and BMP4 expression observed in TCGA GBM PanCan datasets.

Raw Fig1-2

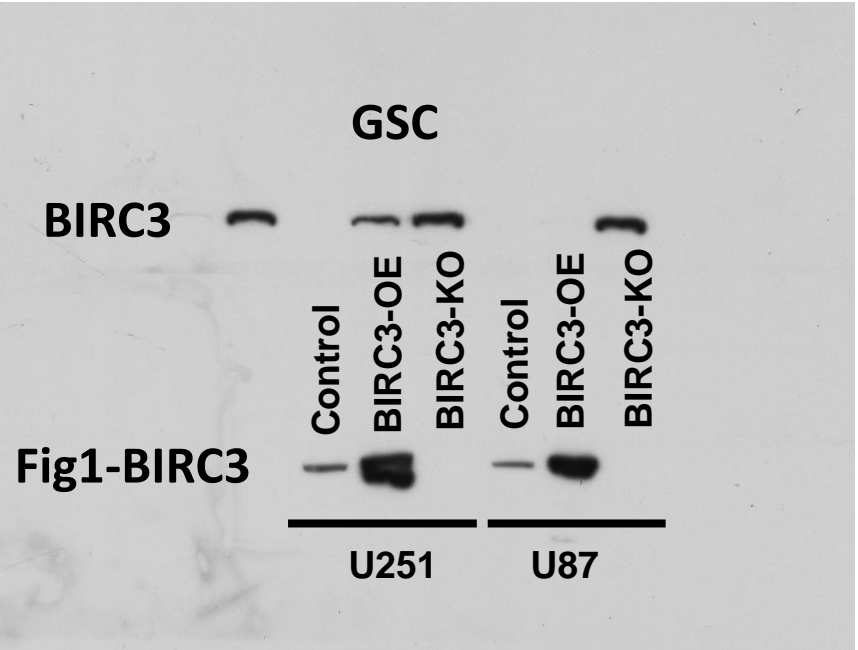

Fig2-BIRC3

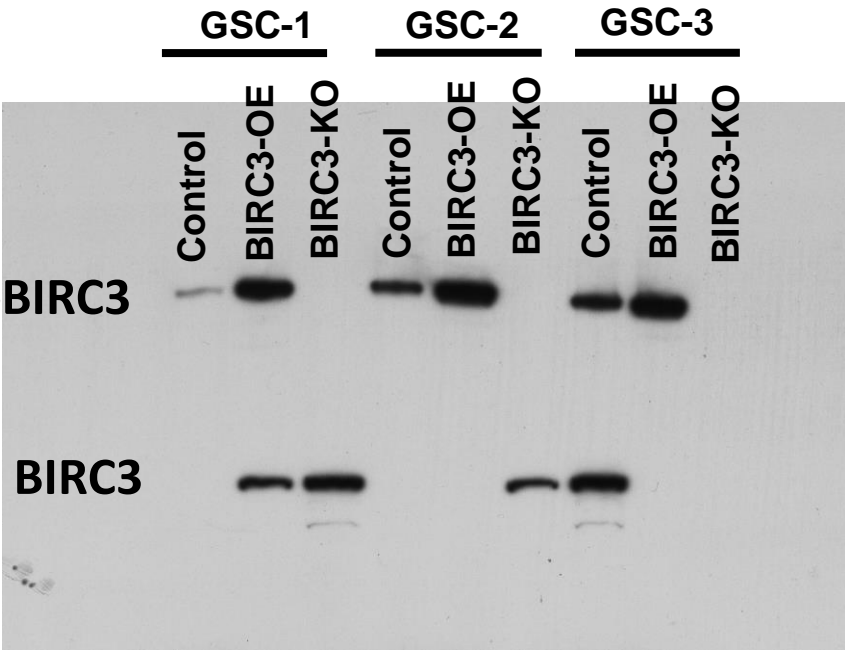

Fig1-BIRC3-CT-2A

BIRC3-CT-2A

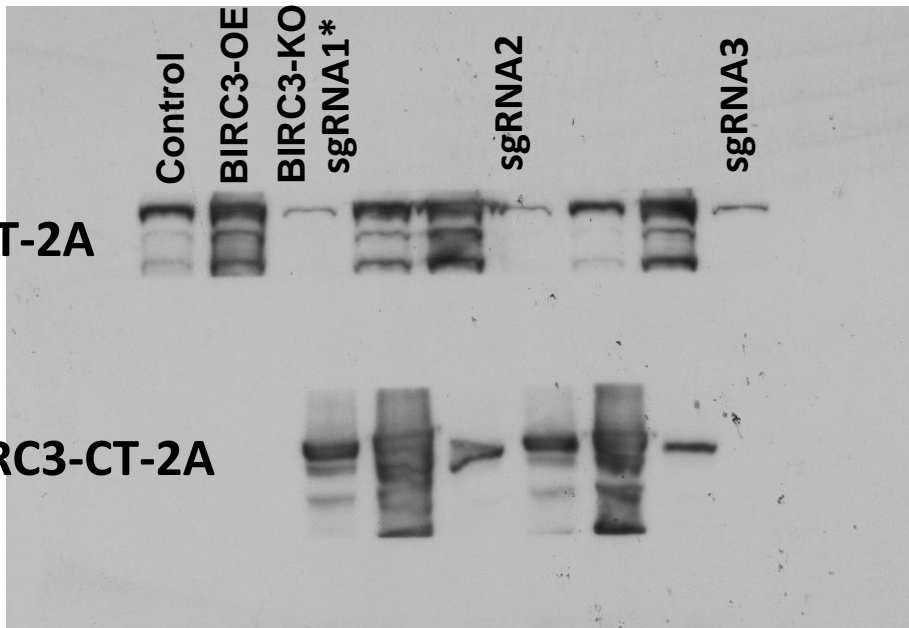

\* sgRNA1 is the sgRNA used in the manuscript for CT-2A cell line

Raw Fig1-2

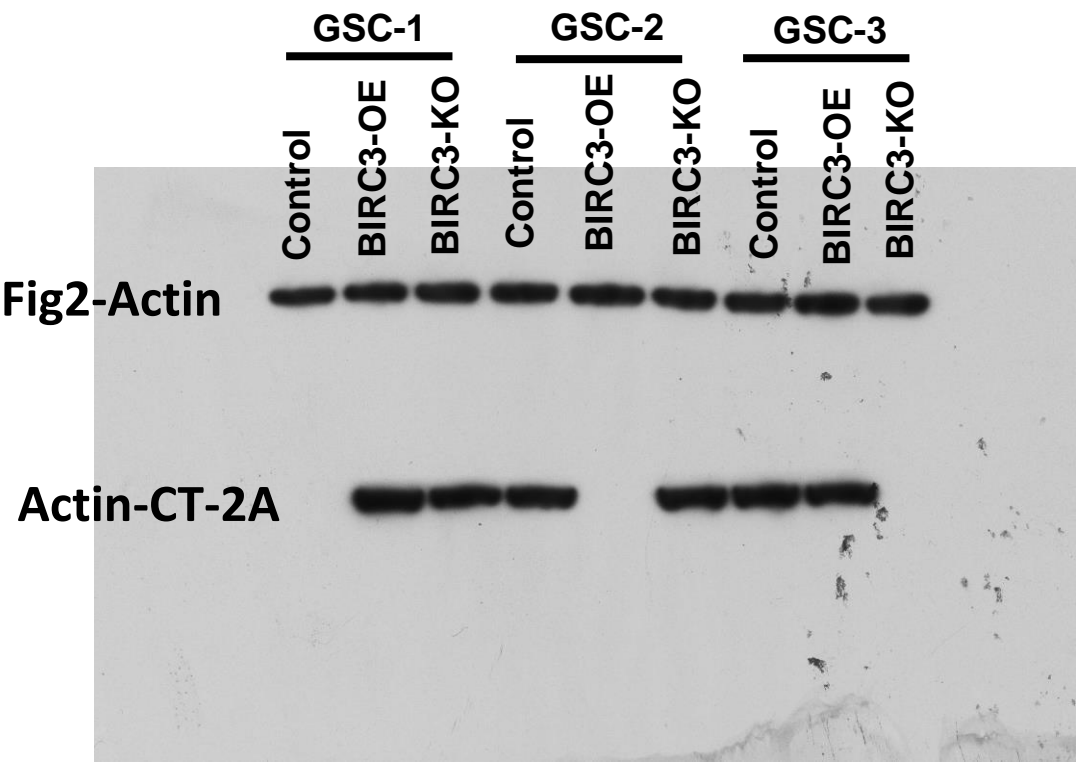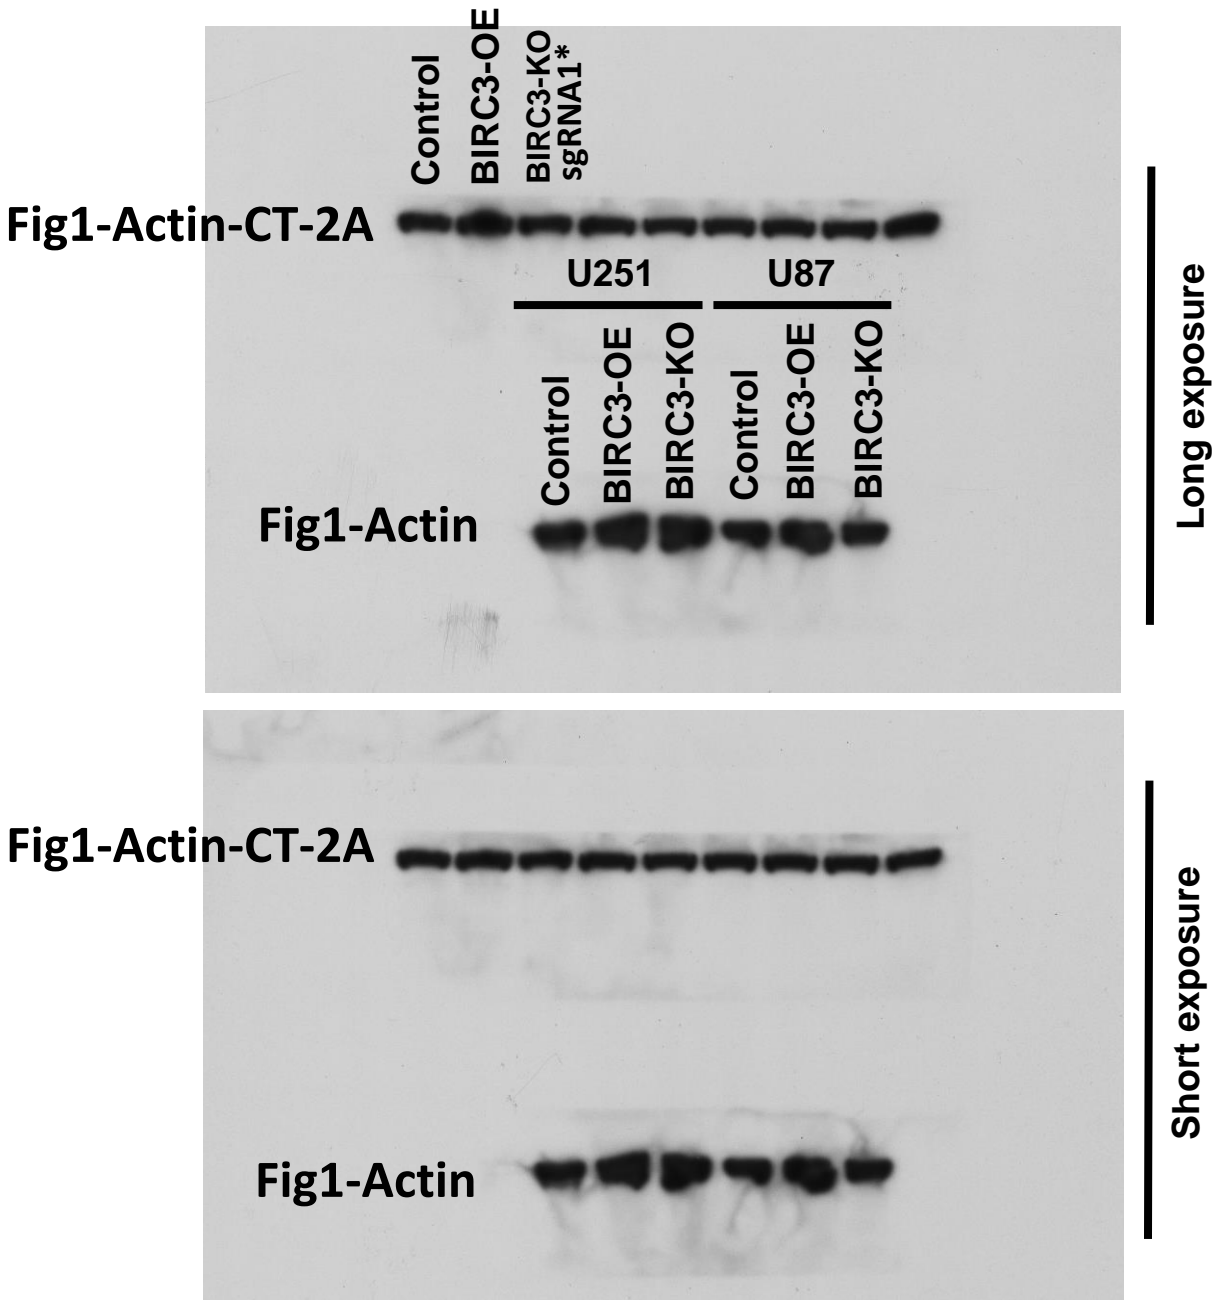

Raw Fig3-4

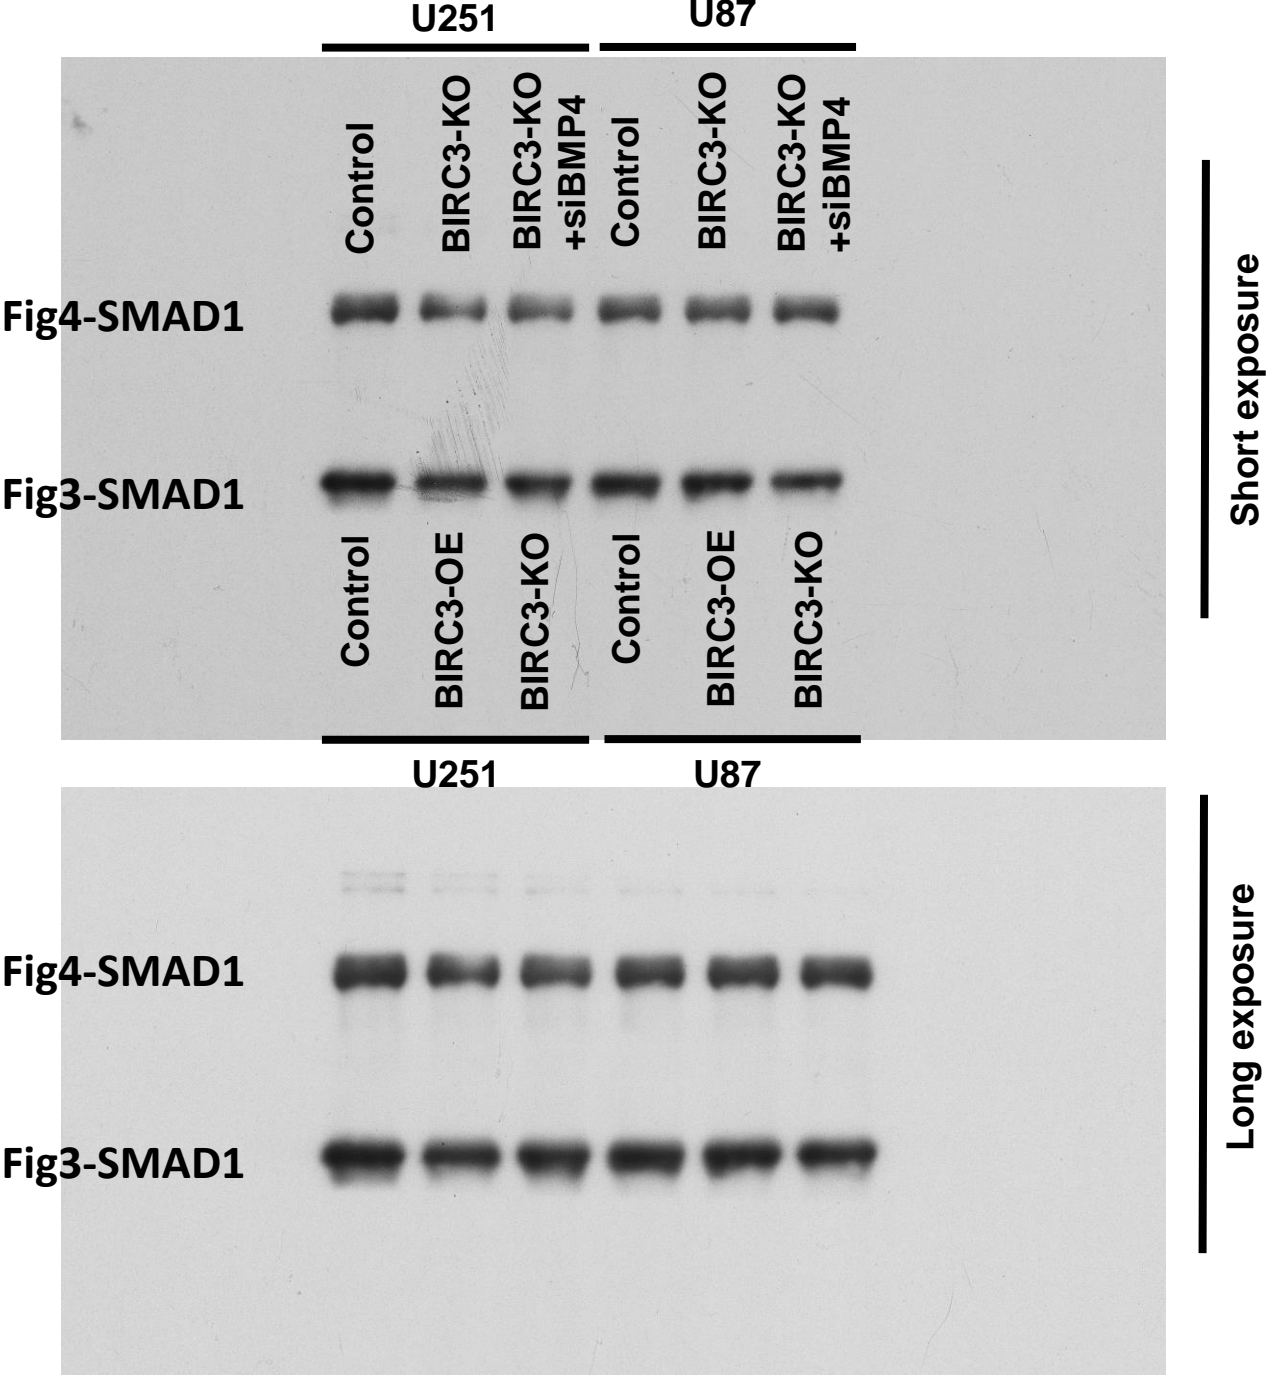

Raw Fig3-4

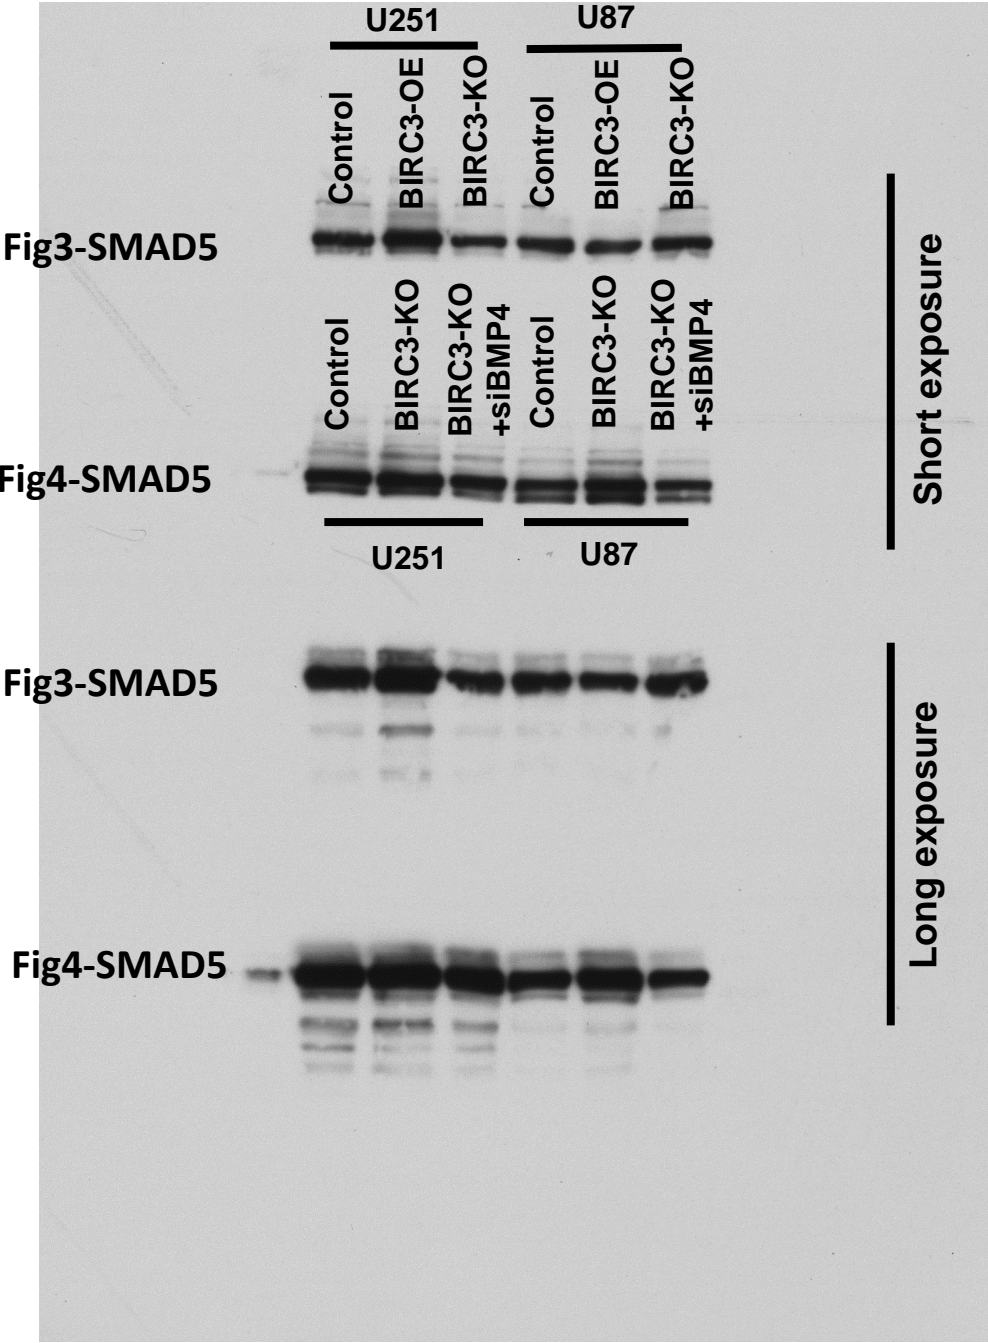

Raw Fig3-4

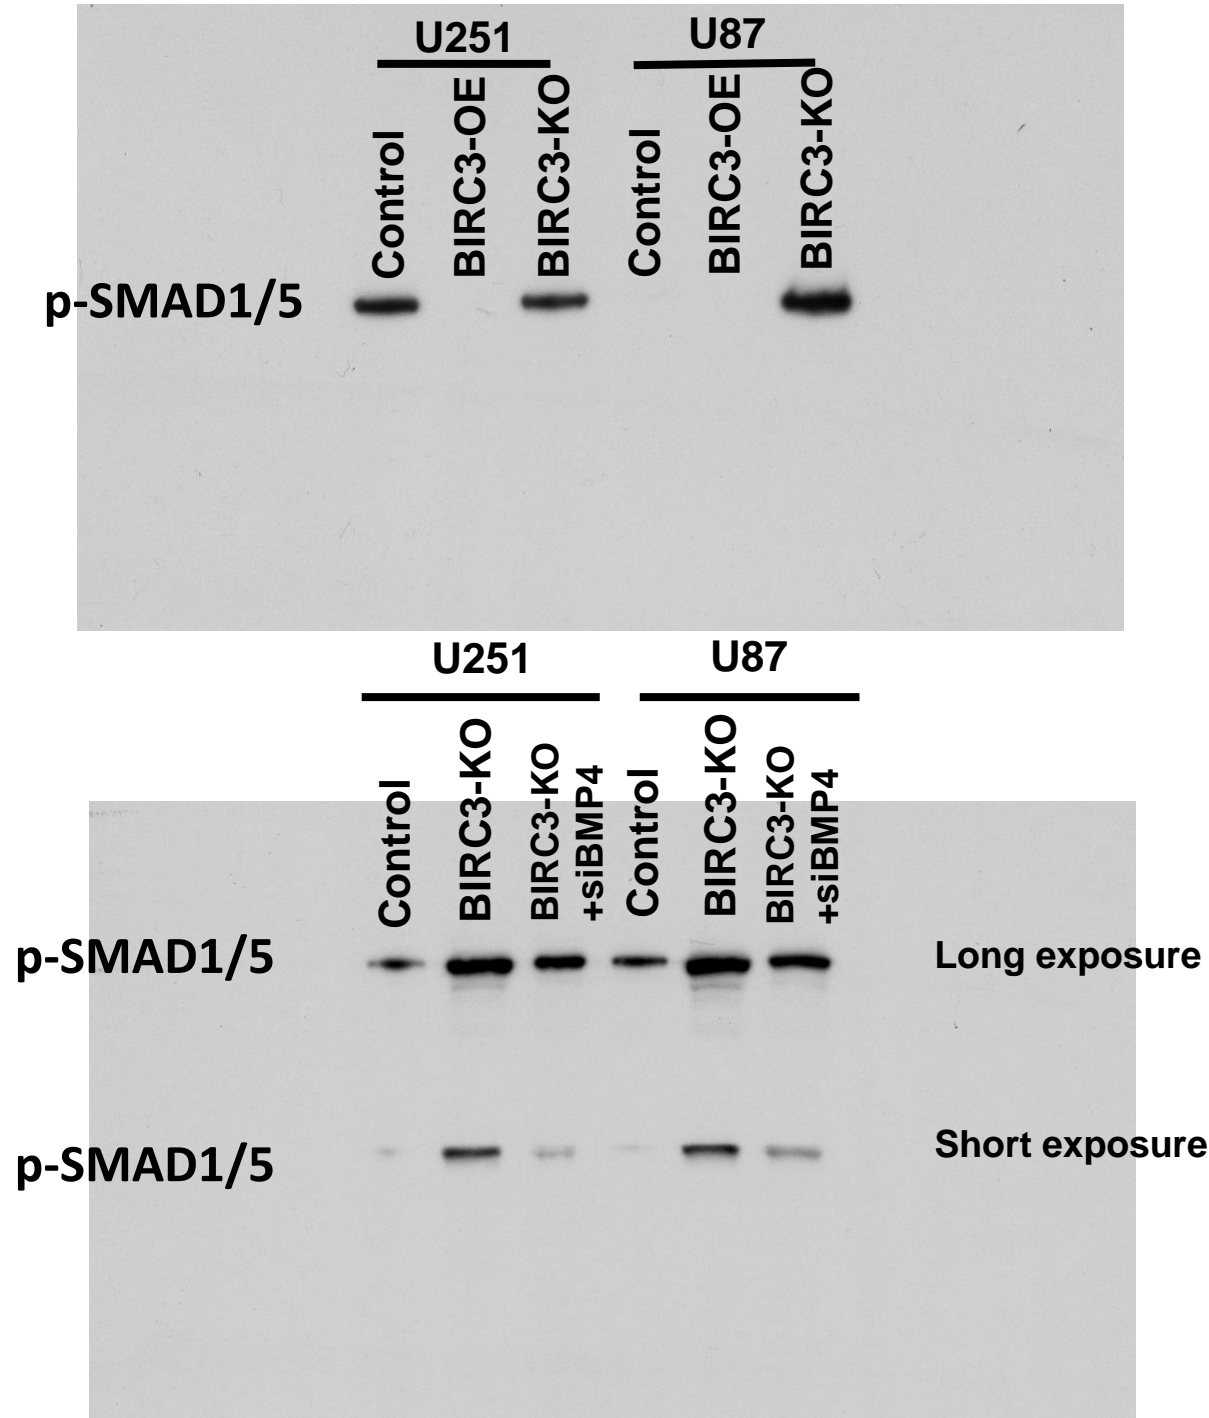



Raw Fig3-4

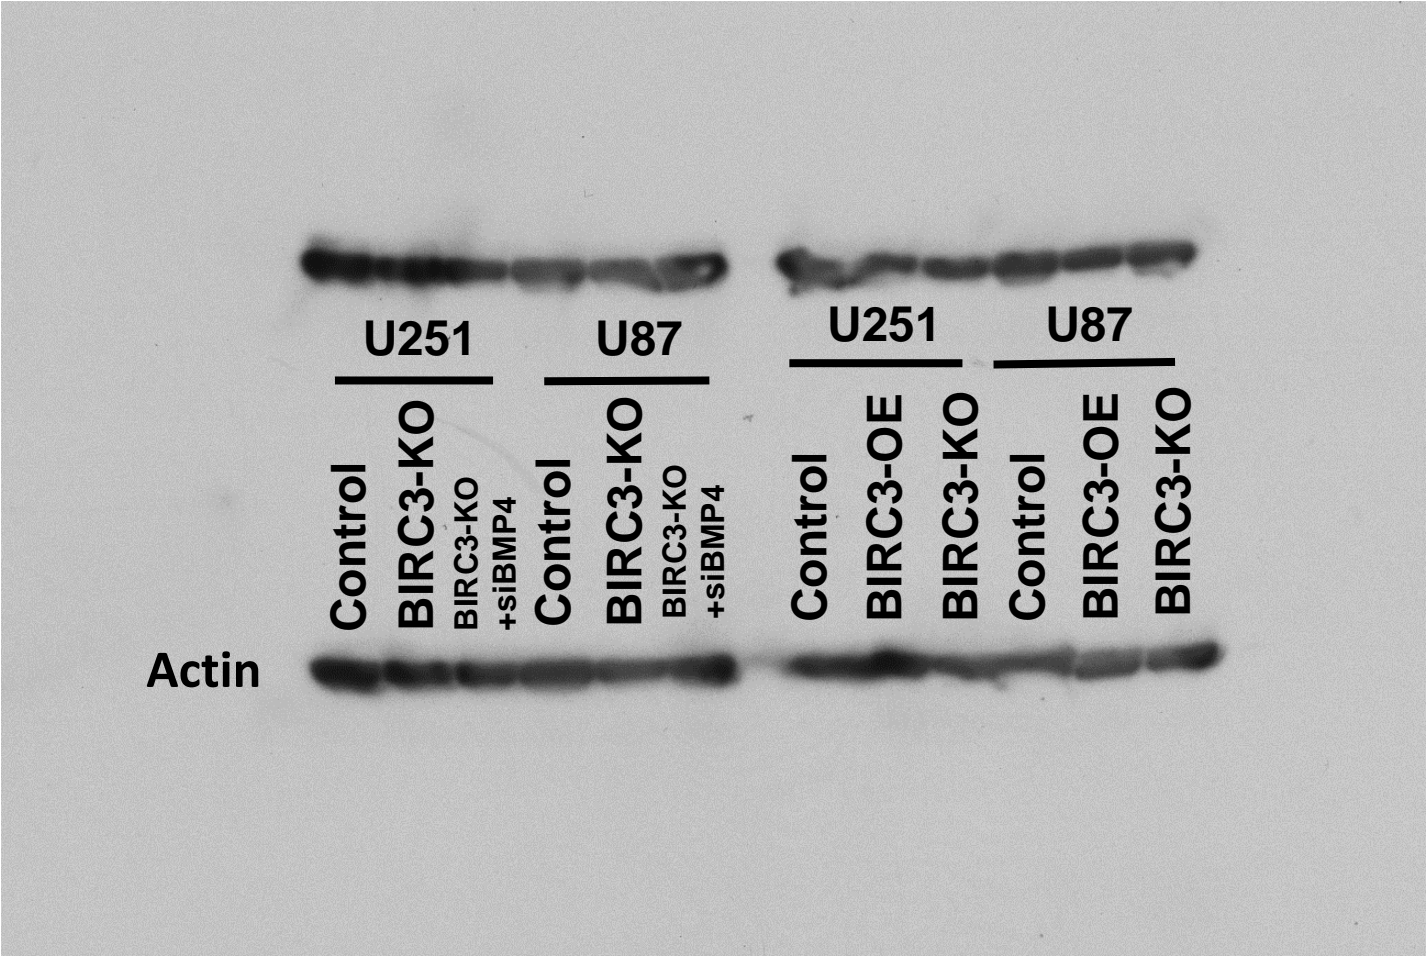

Supplement: s1 [file s1]
